# Supplementary material for: Regulating interface Schottky barriers toward a high-performance self-powered imaging photodetector
Source: Royal Society of Chemistry journal article supplement (doi:10.1039/d2ra04820e), 2022-01-01
Supplement: d2ra04820e1.pdf [file d2ra04820e1.pdf]

## Supporting information

### **Regulating interface Schottky barriers toward high-performance self-powered imaging photodetector**

Jun Yan<sup>a</sup>, Feng Gao<sup>a</sup>, Weiqiang Gong<sup>a</sup>, Yongzhi Tian<sup>b</sup> and Lin Li<sup>a,\*</sup>

<sup>a</sup> Key Laboratory for Photonic and Electronic Bandgap Materials, Ministry of Education, School of Physics and Electronic Engineering, Harbin Normal University  
Harbin 150025, China.

E-mail: [physics\\_lin@hotmail.com](mailto:physics_lin@hotmail.com); [lil@hrbnu.edu.cn](mailto:lil@hrbnu.edu.cn)

<sup>b</sup> School of Physics and Engineering, Zhengzhou University, Zhengzhou, 450001, China.

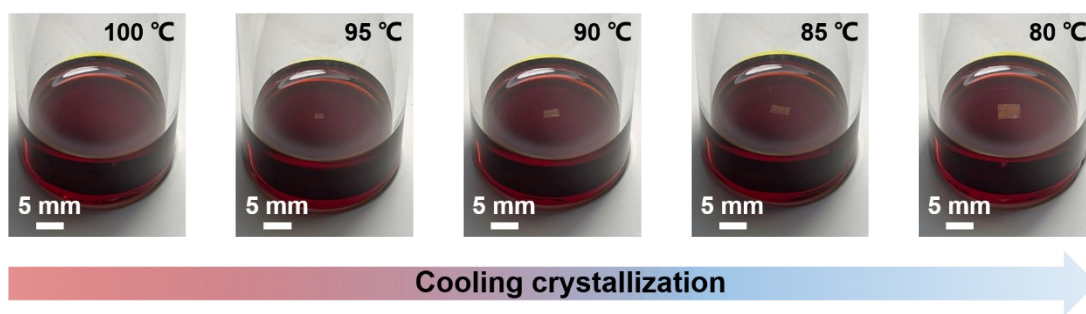

Fig. S1 The photograph of the (PEA)<sub>2</sub>PbI<sub>4</sub> SCs grown with decreasing temperature.

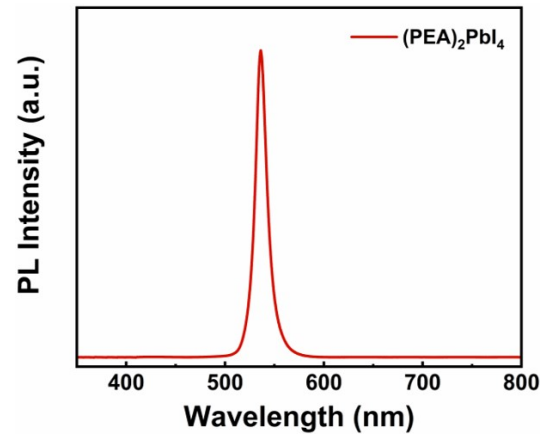

**Fig. S2** The PL spectra of (001) plane of the (PEA)<sub>2</sub>PbI<sub>4</sub> SC.

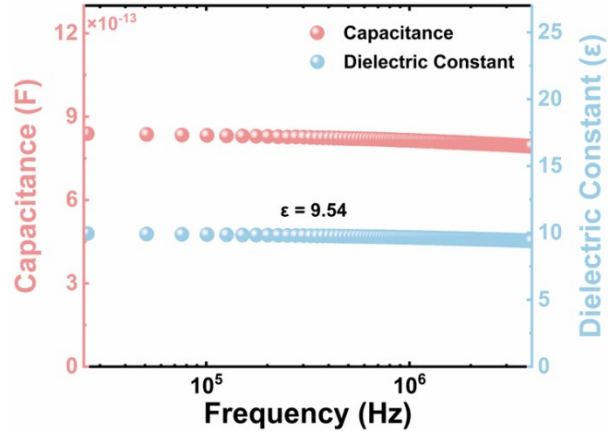

**Fig. S3** Frequency-dependent capacitance and dielectric constant curves for the (PEA)<sub>2</sub>PbI<sub>4</sub> SC device.

**Note S1.** The calculation of the relative dielectric constant of the (PEA)<sub>2</sub>PbI<sub>4</sub> SC.

A simple plate capacitor was built to measure the relative dielectric constant of (PEA)<sub>2</sub>PbI<sub>4</sub> SC. Device configuration was Au/(PEA)<sub>2</sub>PbI<sub>4</sub> SC/Au where the (PEA)<sub>2</sub>PbI<sub>4</sub> SC was served as the dielectric layer. By measuring the capacitance-frequency at dark, as shown in Fig. S2, the relative dielectric constant of the (PEA)<sub>2</sub>PbI<sub>4</sub> SC was obtained by using the parallel plate capacitor model:

$$C = \frac{\epsilon\epsilon_0 S}{d}$$

where  $S$  is the electrode area,  $d$  is the thickness of SCs,  $\epsilon_0$  is the vacuum dielectric constant.

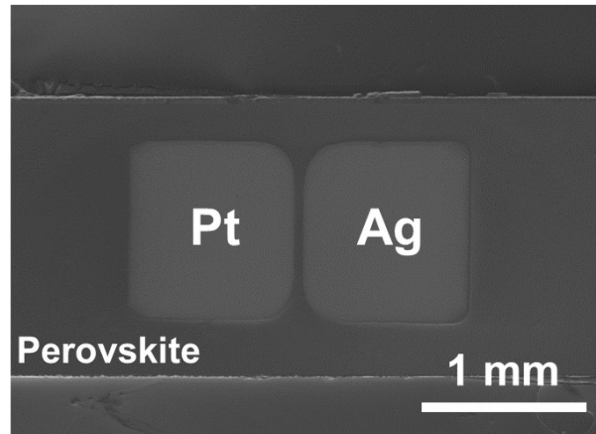

**Fig. S4** The SEM image of the Pt-(PEA)<sub>2</sub>PbI<sub>4</sub>-Ag device.

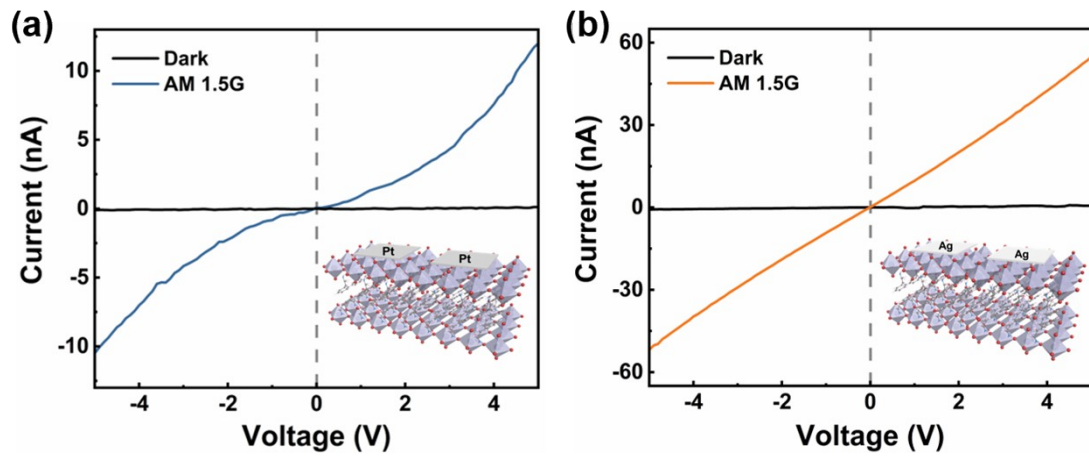

Fig. S5 The linear *I-V* curves for the photodetector in dark and under a solar simulator (AM 1.5G,  $100 \text{ mW cm}^{-2}$ ), (a) Pt-Pt device and (b) Ag-Ag device.

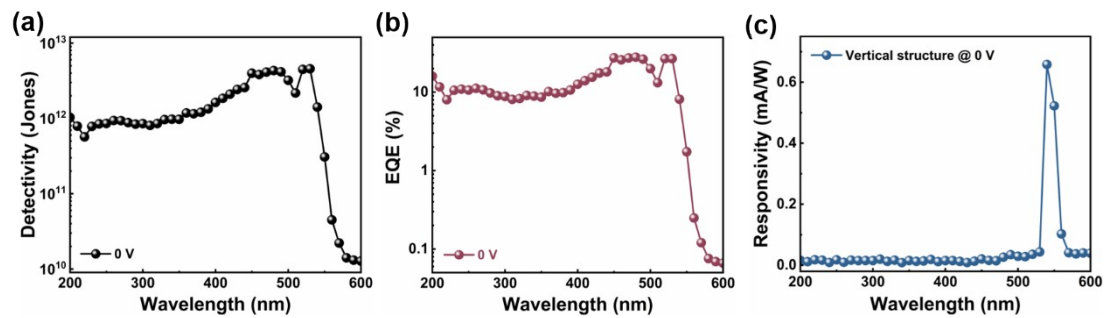

**Fig. S6** (a) The detectivity spectrum of Pt-Ag photodetector at 0 V. (b) The EQE spectrum of the Pt-Ag photodetector at 0 V. (c) The photoresponse curve of the Pt-Ag photodetector with vertical structure at 0 V.

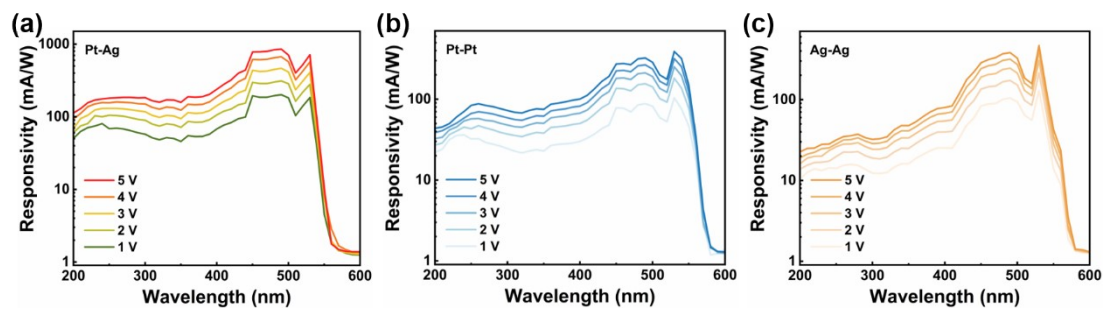

Fig. S7 (a-c) The responsivity spectra of the Pt-Ag, Pt-Pt and Ag-Ag photodetectors at different bias voltage, respectively.



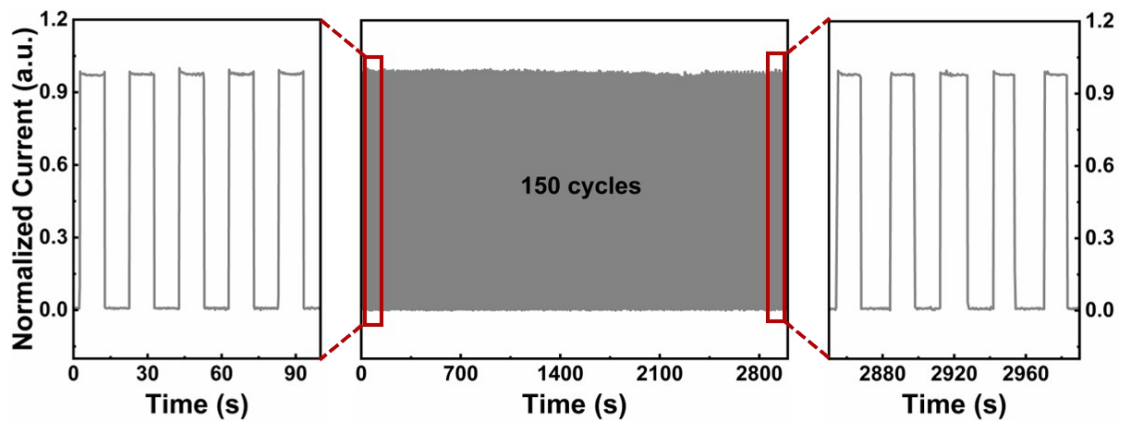

Fig. S8 Long-term  $I-t$  curves of the Pt-Ag photodetector at 0 V.

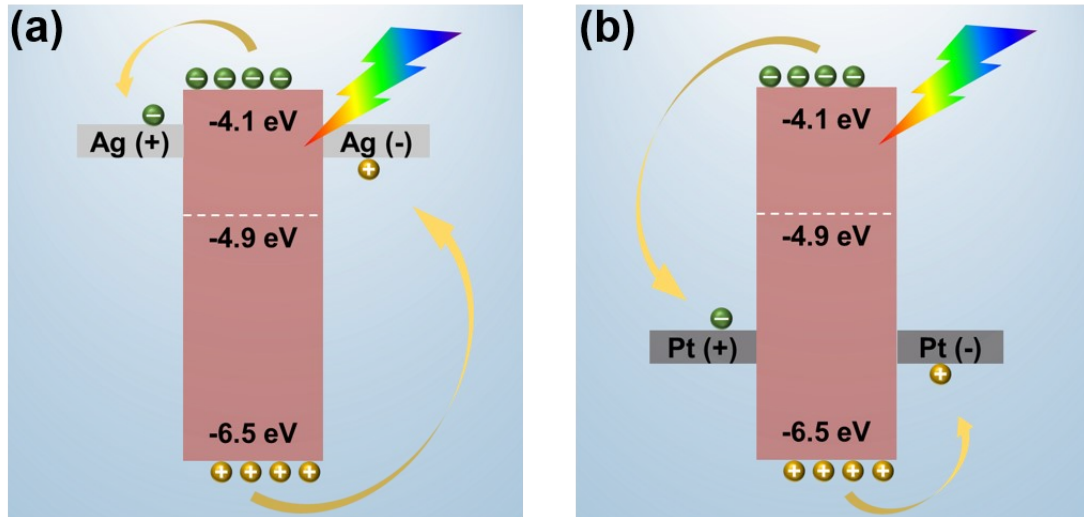

Fig. S9 Energy band diagrams and charge carrier transfer of the devices with (a) Ag-Ag and (b) Pt-Pt symmetric electrodes upon light illumination.

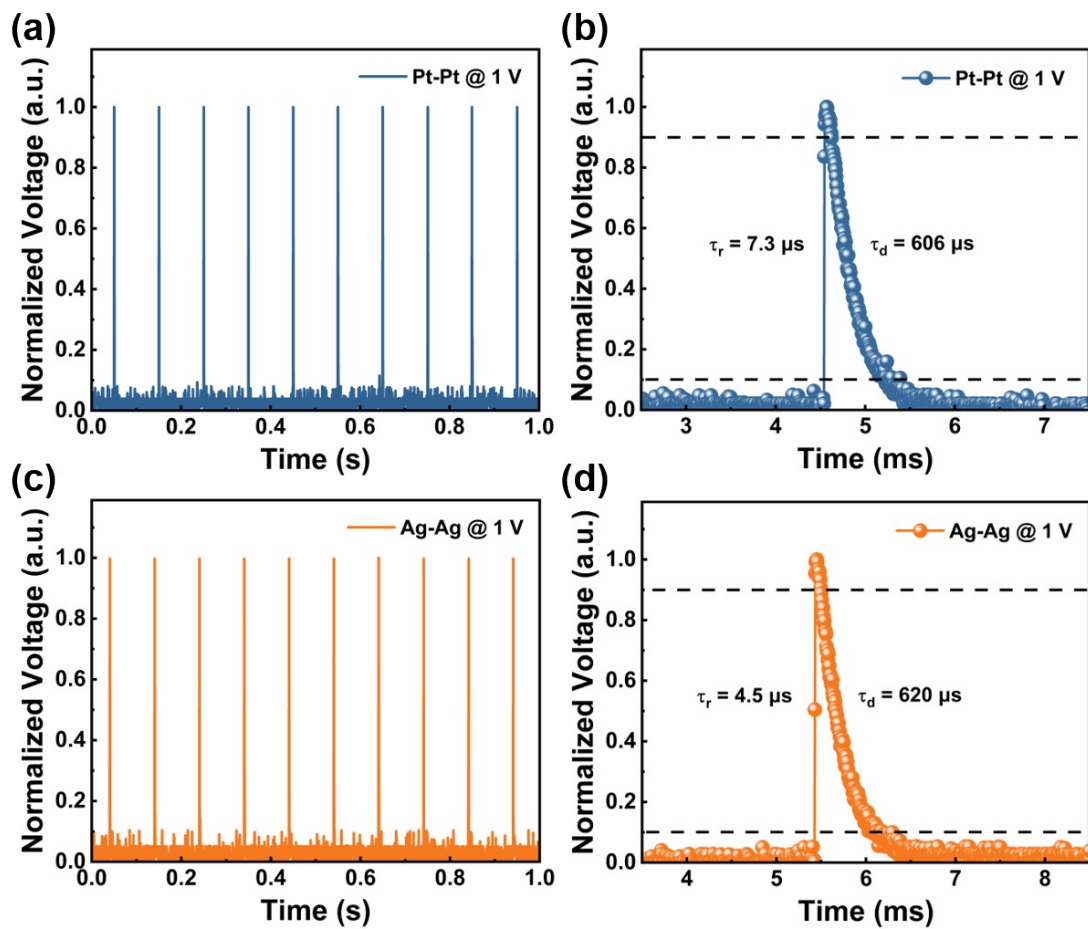

Fig. S10 The time-resolved response at 1 V under the excitation of 355 nm pulsed laser: (a) and (b) the Pt-Pt detector. (c) and (d) the Ag-Ag detector.

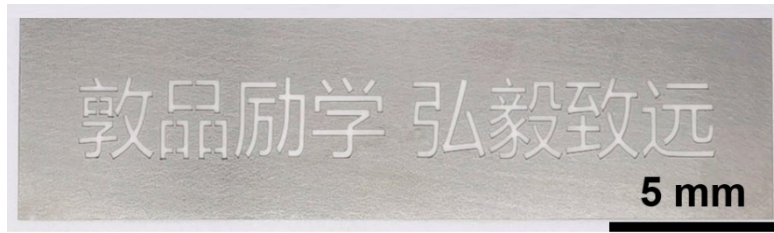

**Fig. S11** The image for the object in a steel foil.
